# Supplementary material
Source: MDPI journal article supplement (https://www.mdpi.com/2073-4395/12/8/1913)
Supplement: s1 [file s1]

Archive with 2 entries (2 files):
- Figure S1.pdf
- Table S1.xlsx
