# Supplementary material
Source: MDPI journal article supplement (https://www.mdpi.com/2073-4395/12/8/1913)

**Figure S1.** The first and second principal components obtained from principal components analysis of wild macadamia accessions. *M.integrifolia* = *Macadamia integrifolia* accessions, *M.tetraphylla* = *M. tetraphylla* accessions, Hybrid = *Macadamia integrifolia* x *M. tetraphylla* accessions.

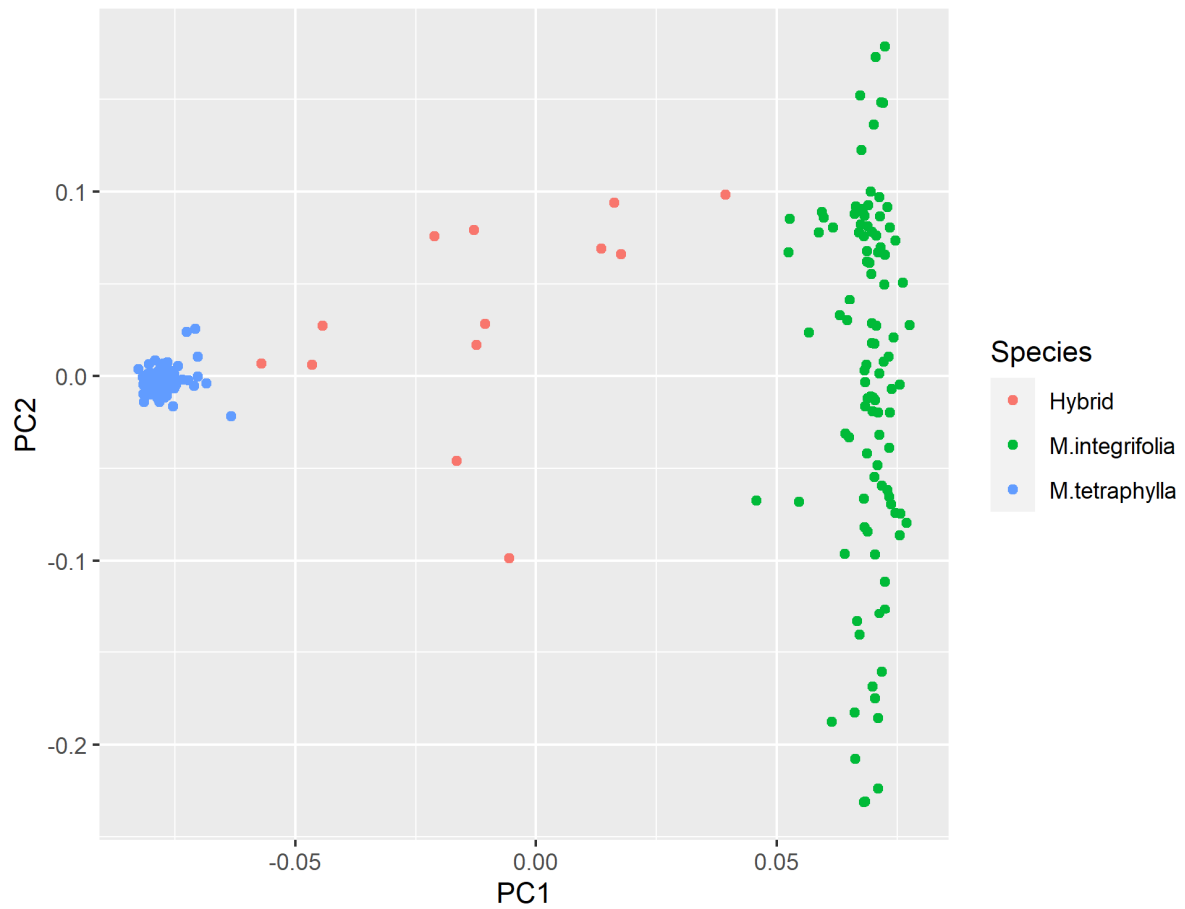

Supplement: s1 [file s1 › Figure S1.pdf]
