# Supplementary material
Source: MDPI journal article supplement (https://www.mdpi.com/2073-4395/12/8/1913)
Supplement: s1 [file s1 › Table S1.xlsx]

## Sheet: Table S1
Trait, Year	SNP ID	Gene	RNA title	Gene	RNA title	Gene	RNA title
Combined panel
STC 2020	631	LOC122061374	mRNA-uncharacterized protein LOC122061374
	4721	LOC122091755	mRNA-protein IQ-DOMAIN 17-like	LOC122091755	mRNA-protein IQ-DOMAIN 17-like
	8180	LOC122076998	mRNA-hydroxymethylglutaryl-CoA synthase-like
	10405	LOC122078465	No results
	11112	LOC122084672	mRNA-pentatricopeptide repeat-containing protein At4g35130, chloroplastic
STC 2021	585	LOC122085728	misc_RNA-zinc finger MYND domain-containing protein 15, transcript variant X4
	631	LOC122061374	mRNA-uncharacterized protein LOC122061374
	6726	LOC122079857	mRNA-heme chaperone HemW	LOC122079860	mRNA-uncharacterized	LOC122079097	mRNA-small heat shock protein, chloroplastic-like
	7248	LOC122088417	mRNA-serine/threonine-protein kinase UCNL-like
	8180	LOC122076998	mRNA-hydroxymethylglutaryl-CoA synthase-like
STI 2020	8180	LOC122076998	mRNA-hydroxymethylglutaryl-CoA synthase-like
	7248	LOC122088417	mRNA-serine/threonine-protein kinase UCNL-like
STI 2021	8180	LOC122076998	mRNA-hydroxymethylglutaryl-CoA synthase-like
	7248	LOC122088417	mRNA-serine/threonine-protein kinase UCNL-like
	5415	LOC122075157	pseudo (exon)
	3891	LOC122084532	mRNA-thioredoxin reductase NTRB-like	LOC122084533	No results
	7910	No results
	4745	LOC122078691	No results
M. integrifolia panel
STC 2020	631	LOC122061374	mRNA-uncharacterized protein LOC122061374
	8180	LOC122076998	mRNA-hydroxymethylglutaryl-CoA synthase-like
	11137	LOC122083846	mRNA-uncharacterized LOC122083846
STC 2021	206	LOC122093861	No results
	631	LOC122061374	mRNA-uncharacterized protein LOC122061374
	5415	LOC122075157	pseudo (exon)
	7694	LOC122091072	mRNA-glucan endo-1,3-beta-glucosidase 1-like	LOC122091744	mRNA-activating signal cointegrator 1 complex subunit 2-like
	8435	LOC122091297	mRNA-uncharacterized LOC122091297	LOC122091296	mRNA-zeta-carotene desaturase, chloroplastic/chromoplastic
	11137	LOC122083846	mRNA-uncharacterized LOC122083846
STI 2021	5415	LOC122075157	pseudo (exon)
	12649	LOC122058391	mRNA-membrane protein PM19L-like	LOC122057031	mRNA-glutamine synthetase leaf isozyme, chloroplastic	LOC122058334	No results
	631	LOC122061374	mRNA-uncharacterized protein LOC122061374
M. tetraphylla panel
STC 2020	4498	LOC122077978	mRNA-fruit protein pKIWI502-like	LOC122077988	mRNA-protein FAM133-like, transcript variant X1
	10405	LOC122078465	No results
	11998	LOC122078465	No results
STC 2021	3338	LOC122060436	mRNA-putative glucose-6-phosphate 1-epimerase
	4745	LOC122078691	No results
	7248	LOC122088417	mRNA-serine/threonine-protein kinase UCNL-like
STI 2020	8554	LOC122059797	No results
	4745	LOC122078691	No results
STI 2021	4745	LOC122078691	No results
	5027	LOC122058408	No results	LOC122057775	mRNA-transcription initiation factor IIA large subunit-like
	10146	LOC122073528	mRNA-uncharacterized LOC122073528	LOC122074067	mRNA-chloride channel protein CLC-f
